# Supplementary material for: MedTech innovation identification: A rapid scoping review of patent research studies to inform horizon scanning methods
Source: bioRxiv or medRxiv preprint supplement (doi:10.1101/2024.12.09.24318714), 2024-12-10
Supplement: Supplementary file [file media-1.pdf]

## Appendix B

Table 1. Characteristics of included studies

|          | <b>Publication details</b>                                                                                                                 | <b>Type of Research Paper</b> | <b>Type of Technology</b>                  | <b>Type of Source</b> |
|----------|--------------------------------------------------------------------------------------------------------------------------------------------|-------------------------------|--------------------------------------------|-----------------------|
| <b>1</b> | Hachimi A et al. A 20-year patent review and innovation trends on hydrogel-based coatings used for medical device biofabrication. 2022[14] | Review                        | Hydrogel-based coatings on medical devices | Patents               |
| <b>2</b> | Borzova E et al. The Patent Landscape Analysis of Skin Bioinks for 3D Bioprinting. 2022[15]                                                | Original Research             | Skin bioinks                               | Patents               |
| <b>3</b> | Tarasova EV et al. Actinomycetes as Producers of Biologically Active Terpenoids: Current Trends and Patents. 2023[16]                      | Review                        | Natural compounds for use in medicine      | Various Sources       |
| <b>4</b> | Asif M et al. Advancements, Trends and Future Prospects of Lower Limb Prosthesis. 2021[17]                                                 | Review                        | Prosthetics                                | Patents               |
| <b>5</b> | Cammarano A et al. Advances in Transdermal Drug Delivery Systems: A Bibliometric and Patent Analysis. 2023[18]                             | Review                        | Transdermal drug delivery                  | Various Sources       |
| <b>6</b> | Mitsumori Y et al. An Analysis of COVID-19 Related IPRs: Should they be Promoted, Waived or Pooled? 2022[19]                               | Review                        | Vaccines and pharmaceuticals               | Patents               |
| <b>7</b> | Ge J et al. Analysis of patent development status of lipid nanoparticle delivery system for mRNA vaccines. 2022[20]                        | Original Research             | mRNA vaccines                              | Patents               |

|           |                                                                                                                                                                    |                   |                                         |                 |
|-----------|--------------------------------------------------------------------------------------------------------------------------------------------------------------------|-------------------|-----------------------------------------|-----------------|
| <b>8</b>  | Danylenko YA et al. Analysis of scintillation materials for nuclear medicine on the basis of patent analytics. 2023[21]                                            | Original Research | Component of medical diagnostic devices | Patents         |
| <b>9</b>  | Oda T et al, An analysis of the key drivers of the Japanese digital therapeutics patents: A cross-sectional study. 2023[22]                                        | Original Research | Digital therapeutics                    | Patents         |
| <b>10</b> | Wei F et al. Analysis of trends in patent development for coronavirus detection, prevention, and treatment technologies in key countries. 2021{Wei, 2022 #1844}    | Review            | Detection, vaccines, and treatment      | Patents         |
| <b>11</b> | Lee JH et al. Analysis of trends in patents on insect-derived medicinal materials for skin diseases. 2020[23]                                                      | Original Research | Insect-derived medicinal materials      | Patents         |
| <b>12</b> | Silva M et al. Antarctic organisms as a source of antimicrobial compounds: a patent review. 2022[24]                                                               | Review            | Antimicrobial compounds                 | Patents         |
| <b>13</b> | Wu NJW et al. The Application of Nanotechnology for Quantification of Circulating Tumour DNA in Liquid Biopsies: A Systematic Review. 2022[25]                     | Review            | Nanotechnology                          | Various Sources |
| <b>14</b> | Ragno L et al. Application of Social Robots in Healthcare: Review on Characteristics, Requirements, Technical Solutions. 2023[26]                                  | Review            | Social robots                           | Various Sources |
| <b>15</b> | Borge L et al. Assessing Interdisciplinary Research Within an Emerging Technology Network: A Novel Approach Based on Patents in the Field of Bioplastics. 2022[27] | Original Research | Bioplastics                             | Patents         |

|           |                                                                                                                                                                   |                     |                                      |                 |
|-----------|-------------------------------------------------------------------------------------------------------------------------------------------------------------------|---------------------|--------------------------------------|-----------------|
| <b>16</b> | Sertkaya A et al. Assessing the state of antibacterial drug discovery through patent analysis. 2023[28]                                                           | Short communication | Antibacterial drugs                  | Patents         |
| <b>17</b> | Cañete P et al. Assistive Technology to Improve Collaboration in Children with ASD: State-of-the-Art and Future Challenges in the Smart Products Sector. 2022[29] | Review              | Assistive technology                 | Various Sources |
| <b>18</b> | Liu XX et al. Bibliometric Study of Adaptogens in Dermatology: Pharmacophylogeny, Phytochemistry, and Pharmacological Mechanisms. 2023[30]                        | Review              | Medicinal Plants                     | Various Sources |
| <b>19</b> | Yuan YJ et al. CAR-based cell therapy: evaluation with bibliometrics and patent analysis. 2021[31]                                                                | Review              | CAR-based cell therapy               | Various Sources |
| <b>20</b> | Speziali M et al. Cellulose technologies applied to biomedical purposes from the patentometric point of view. 2020[32]                                            | Original Research   | Cellulose technologies               | Patents         |
| <b>21</b> | Tiwari A et al. Cheminformatics: A Patentometric Analysis. 2022[33]                                                                                               | Original Research   | Cheminformatics                      | Patents         |
| <b>22</b> | Chuah LH et al. Chitosan based drug delivery systems for skin atopic dermatitis: recent advancements and patent trends. 2023[34]                                  | Review              | Chitosan based drug delivery systems | Patents         |
| <b>23</b> | Altuntas S et al. A clustering-based approach for the evaluation of candidate emerging technologies. 2020[35]                                                     | Original Research   | Dental implants                      | Patents         |
| <b>24</b> | Lee S et al. Comparing technology convergence of artificial intelligence on the industrial sectors: two-way                                                       | Original Research   | Cross-industry                       | Patents         |

|           |                                                                                                                                                                  |                   |                                                      |                 |
|-----------|------------------------------------------------------------------------------------------------------------------------------------------------------------------|-------------------|------------------------------------------------------|-----------------|
|           | approaches on network analysis and clustering analysis. 2021[36]                                                                                                 |                   |                                                      |                 |
| <b>24</b> | Fluit R et al. A Comparison of Control Strategies in Commercial and Research Knee Prostheses. 2019[37]                                                           | Review            | Knee prostheses                                      | Various Sources |
| <b>26</b> | Melo RL et al. A comprehensive review on enzyme-based biosensors: Advanced analysis and emerging applications in nanomaterial-enzyme linkage. 2024[38]           | Review            | Enzyme based biosensors                              | Various Sources |
| <b>27</b> | Sanchez-Campos N, et al. Conotoxin Patenting Trends in Academia and Industry. 2022[39]                                                                           | Review            | Conotoxins                                           | Patents         |
| <b>28</b> | Ailia MJ, et al. Current Trend of Artificial Intelligence Patents in Digital Pathology: A Systematic Evaluation of the Patent Landscape. 2022[40]                | Review            | Digital pathology                                    | Patents         |
| <b>29</b> | Chen Y, et al. Delivery of therapeutic small interfering RNA: The current patent-based landscape. 2022[41]                                                       | Original Research | siRNA delivery technologies                          | Patents         |
| <b>30</b> | Bhatnagar P, et al. Delivery systems for platelet derived growth factors in wound healing: A review of recent developments and global patent landscape. 2022[42] | Review            | Delivery systems for platelet derived growth factors | Patents         |
| <b>31</b> | Valadas LAR, et al. Development and innovation on dental products in Argentina: A technological prospecting based on patents. 2020[43]                           | Original Research | Dental products                                      | Patents         |
| <b>32</b> | Xu CM, et al. The Development of Marine Drugs: A Research Based on Patent Analysis. 2020[44]                                                                     | Original Research | Marine drugs                                         | Patents         |

|           |                                                                                                                                                                                     |                   |                                              |                 |
|-----------|-------------------------------------------------------------------------------------------------------------------------------------------------------------------------------------|-------------------|----------------------------------------------|-----------------|
| <b>33</b> | Imran M, et al. Development of Therapeutic and Prophylactic Zinc Compositions for Use against COVID-19: A Glimpse of the Trends, Inventions, and Patents. 2022[45]                  | Review            | Prophylactic Zinc Compositions               | Patents         |
| <b>34</b> | Chang SH. The development trend and academic patent technology network of laser and optical technologies. 2021[46]                                                                  | Original Research | Laser and optical technologies               | Patents         |
| <b>35</b> | Xin Y, et al. The development trend of artificial intelligence in medical: A patentometric analysis. 2021[47]                                                                       | Original Research | Medical                                      | Patents         |
| <b>36</b> | Singh M, et al. Diagnostic and therapeutic approaches for endometriosis: a patent landscape. 2023[48]                                                                               | Review            | Diagnostics and therapeutics                 | Patents         |
| <b>37</b> | Litvinova O, et al. Digital Pills with Ingestible Sensors: Patent Landscape Analysis. 2022[49]                                                                                      | Review            | Digital pills with sensors                   | Various Sources |
| <b>38</b> | Imran M, et al. Discovery, Development, and Patent Trends on Molnupiravir: A Prospective Oral Treatment for COVID-19. 2021[50]                                                      | Review            | Molnupiravir                                 | Patents         |
| <b>39</b> | Imran M, et al. Discovery, Development, Inventions, and Patent Trends on Mobocertinib Succinate: The First-in-Class Oral Treatment for NSCLC with EGFR Exon 20 Insertions. 2021[50] | Review            | Mobocertinib Succinate                       | Patents         |
| <b>40</b> | Jeon D, et al. A doc2vec and local outlier factor approach to measuring the novelty of patents. 2021[51]                                                                            | Original Research | Medical Imaging                              | Patents         |
| <b>41</b> | Sharma R, et al. Drug Discovery, Diagnostic, and therapeutic trends on Mpx: A patent landscape. 2021[52]                                                                            | Original Research | Drug Discovery, Diagnostic, and therapeutics | Patents         |

|           |                                                                                                                                        |                   |                                                       |                 |
|-----------|----------------------------------------------------------------------------------------------------------------------------------------|-------------------|-------------------------------------------------------|-----------------|
| <b>42</b> | Mohajel N, et al. Ebola as a case study for the patent landscape of medical countermeasures for emerging infectious diseases. 2021[53] | Original research | Diagnostic tests and vaccines                         | Patents         |
| <b>43</b> | Picanco-Castro V, et al. Emerging CAR T cell therapies: clinical landscape and patent technological routes. 2020[54]                   | Review            | CAR T cell therapies                                  | Various Sources |
| <b>44</b> | Zhou WY, et al. Emerging Patent Landscape for Gene Therapy as a Potential Cure for COVID-19. 2021[55]                                  | Review            | Gene therapy                                          | Various Sources |
| <b>45</b> | Picanco-Castro V, et al. Emerging patent landscape for non-viral vectors used for gene therapy. 2020{Picanco-Castro, 2020 #1910}       | Original research | Gene therapy                                          | Various Sources |
| <b>46</b> | Abdi S, et al. Emerging technologies and their potential for generating new assistive technologies. 2021[56]                           | Original research | Assistive technology                                  | Various Sources |
| <b>47</b> | Wadhawa R, et al. Exploring the landscape of genetics patents in the United States from 2005 to 2020. 2022[57]                         | Original research | Genetics                                              | Patents         |
| <b>48</b> | Robinson AA, et al. Examining the Role of Actors in an Emerging Technological System: The Case of POC Devices. 2023[58]                | Original research | Micro/nanofluidic-based point-of-care (mnPOC) devices | Various Sources |
| <b>49</b> | Jeon E, et al. Exploring new digital therapeutics technologies for psychiatric disorders using BERTopic and PatentSBERTa. 2021[59]     | Original research | Digital therapeutics (DTx)                            | Patents         |
| <b>50</b> | Gadiya Y, et al. Exploring SureChEMBL from a drug discovery perspective. 2024[60]                                                      | Original research | Pharmaceutical drugs                                  | Patents         |

|           |                                                                                                                                              |                   |                        |                 |
|-----------|----------------------------------------------------------------------------------------------------------------------------------------------|-------------------|------------------------|-----------------|
| <b>51</b> | Wang YH. Exploring Technology-Driven Technology Roadmaps (TRM) for Wearable Biosensors in Healthcare. 2024[61]                               | Original research | Wearable biosensors    | Various Sources |
| <b>52</b> | Singh P, et al. Ficus benghalensis-A comprehensive review on pharmacological research, nanotechnological applications, and patents. 2023[62] | Review            | Ficus benghalensis     | Various Sources |
| <b>53</b> | Culmone C, et al. Follow-The-Leader Mechanisms in Medical Devices: A Review on Scientific and Patent Literature. 2021[63]                    | Review            | Medical Devices        | Various Sources |
| <b>54</b> | Zagoya-Lopez Z, et al. Foot/Ankle Prostheses Design Approach Based on Scientometric and Patentometric Analyses. 2021[64]                     | Review            | Foot/Ankle prostheses  | Various Sources |
| <b>55</b> | Lyu L, et al. The global chimeric antigen receptor T (CAR-T) cell therapy patent landscape. 2020[65]                                         | Original research | CAR-T cell therapy     | Patents         |
| <b>56</b> | Frisio DG, et al. Global Innovation Trends for Plant-Based Vaccines Production: A Patent Analysis. 2021[66]                                  | Original research | Plant-based vaccines   | Patents         |
| <b>57</b> | Liu K, et al. Global landscape of patents related to human coronaviruses. 2021[67]                                                           | Review            | Human Coronaviruses    | Patents         |
| <b>58</b> | Li M, et al. The global mRNA vaccine patent landscape. 2022{Li, 2022 #1931}                                                                  | Original research | RNA vaccines           | Patents         |
| <b>59</b> | Braga L, et al. The global patent landscape of artificial intelligence applications for cancer. 2023[68]                                     | Original research | AI cancer applications | Patents         |

|    |                                                                                                                                                                 |                   |                                          |                 |
|----|-----------------------------------------------------------------------------------------------------------------------------------------------------------------|-------------------|------------------------------------------|-----------------|
| 69 | Liu K, et al. Global Patent Landscape of Benign Prostatic Hyperplasia Drugs. 2022[69]                                                                           | Original research | Benign prostatic hyperplasia (BPH) drugs | Patents         |
| 61 | Cai Y, et al. The global patent landscape of emerging infectious disease monkeypox. 2024[70]                                                                    | Original research | Monkeypox                                | Patents         |
| 62 | Li Q, et al. The global patent landscape of HER2-targeted biologics. 2023[71]                                                                                   | Original research | HER2-targeted therapies                  | Patents         |
| 63 | Lyu M, et al. The global patent landscape of mRNA for diagnosis and therapy. 2023[72]                                                                           | Original research | Messenger RNA (mRNA)                     | Patents         |
| 64 | Liu K, et al. Global research on artemisinin and its derivatives: Perspectives from patents. 2020[73]                                                           | Review            | Artemisinin derivatives                  | Patents         |
| 65 | Maresova P, et al. Health-Related ICT Solutions of Smart Environments for Elderly-Systematic Review. 2020[74]                                                   | Review            | ICT for smart environments               | Various Sources |
| 66 | Zhou W, et al. Human gene therapy: A patent analysis. 2021[75]                                                                                                  | Review            | Gene therapy                             | Patents         |
| 67 | Machuca-Martinez F, et al. Coronaviruses: A patent dataset report for research and development (R&D) analysis. 2020[76]                                         | Original research | Coronaviruses                            | Patents         |
| 68 | Shin HJ, et al. Identifying Areas of Technology Commercialization in the Biomedical Sector: An Integrated Analysis of Patents and Publications. 2022[77]        | Original research | Biomedical technologies                  | Other           |
| 69 | Raghu Kiran, CVS, et al. Idiom of gastroretentive drug delivery systems: Comprehensive view on innovation technologies, patents and clinical [trials]. 2023[78] | Review            | Gastroretentive drug delivery            | Various Sources |



|           |                                                                                                                                                                                                                                |                   |                                       |                 |
|-----------|--------------------------------------------------------------------------------------------------------------------------------------------------------------------------------------------------------------------------------|-------------------|---------------------------------------|-----------------|
| <b>70</b> | Imran M, et al. Innovations and patent trends in the development of USFDA approved protein Kinase inhibitors in the last two decades. 2021[79]                                                                                 | Review            | Protein Kinase Inhibitors             | Patents         |
| <b>71</b> | Aboy M, et al. Mapping the European patent landscape for medical uses of known products. 2021[80]                                                                                                                              | Original Research | N/A                                   | Patents         |
| <b>72</b> | Aboy M, et al. Mapping the patent landscape of medical machine learning. 2023[81]                                                                                                                                              | Original Research | Machine Learning                      | Patents         |
| <b>73</b> | Burgio V, et al. Mechanical Stapling Devices for Soft Tissue Repair: A Review of Commercially Available Linear, Linear Cutting, and Circular Staplers. 2024[82]                                                                | Review            | Mechanical Stapling Devices           | Various Sources |
| <b>74</b> | Queiroz AAFLN, et al. mHealth Strategies Related to HIV Postexposure Prophylaxis Knowledge and Access: Systematic Literature Review, Technology Prospecting of Patent Databases, and Systematic Search on App Stores. 2021[83] | Review            | Mobile health (mHealth) interventions | Various Sources |
| <b>75</b> | Lohita S, et al. Myocardial Infarction: Background, Recent Advances, and Interventions Supported by Clinical Trial and Patent Landscape. 2023[84]                                                                              | Review            | Not specified                         | Various Sources |
| <b>76</b> | Zhang HL, et al. New Frontier in Antiviral Drugs for Disorders of the Respiratory System. 2022[85]                                                                                                                             | Original research | Antiviral drugs                       | Patents         |
| <b>77</b> | Mancilla-de-la-Cruz J, et al. The Next Pharmaceutical Path: Determining Technology Evolution in Drug                                                                                                                           | Original research | Additive                              | Various Sources |

|           |                                                                                                                                                              |                   |                              |                 |
|-----------|--------------------------------------------------------------------------------------------------------------------------------------------------------------|-------------------|------------------------------|-----------------|
|           | Delivery Products Fabricated with Additive Manufacturing. 2020[86]                                                                                           |                   |                              |                 |
| <b>78</b> | Riondato M, et al. Oldie but Goodie: Is Technetium-99m Still a Treasure Trove of Innovation for Medicine? A Patents Analysis (2000–2022). 2023[87]           | Original research | Technetium-99m               | Patents         |
| <b>79</b> | Colonia BSO, et al. Omega-3 microbial oils from marine thraustochytrids as a sustainable and technological solution: A review and patent landscape. 2020[88] | Original research | Omega-3 microbial oils       | Various Sources |
| <b>80</b> | Ma J, et al. Organization oriented technology opportunities analysis based on predicting patent networks: a case of Alzheimer's disease. 2022[89]            | Original research | Technologies (not specified) | Patents         |
| <b>81</b> | Litvinova O, et al. Patent analysis of digital sensors for continuous glucose monitoring. 2023[90]                                                           | Review            | Digital sensors              | Various Sources |
| <b>82</b> | Klongthong W, et al. A Patent Analysis to Identify Emergent Topics and Convergence Fields: A Case Study of Chitosan. 2021[91]                                | Original research | Chitosan                     | Patents         |
| <b>83</b> | Hani U, et al. Patent bibliometrics in spinal deformity: the first bibliometric analysis of spinal deformity's technological literature. 2023[92]            | Original research | Surgical devices             | Patents         |
| <b>84</b> | Devarapalli P, et al. Patent intelligence of RNA viruses: Implications for combating emerging and re-emerging RNA virus based infectious diseases. 2022[93]  | Original research | RNA viruses                  | Patents         |
| <b>85</b> | Hernández-Melchor D, et al. The patent landscape in the field of stem                                                                                        | Original research | Stem cell therapy            | Patents         |

|           |                                                                                                                                                                                  |                   |                                                                                                                         |                 |
|-----------|----------------------------------------------------------------------------------------------------------------------------------------------------------------------------------|-------------------|-------------------------------------------------------------------------------------------------------------------------|-----------------|
|           | cell therapy: closing the gap between research and clinic. 2024[94]                                                                                                              |                   |                                                                                                                         |                 |
| <b>86</b> | Greenberg A, et al. Patent landscape of brain-machine interface technology. 2021[95]                                                                                             | Original research | Brain-machine interface                                                                                                 | Patents         |
| <b>87</b> | Cho YD, et al. Patent landscape report on dental implants: A technical analysis. 2021[96]                                                                                        | Original research | Dental implants                                                                                                         | Patents         |
| <b>88</b> | Litvinova O, et al. Patent landscape review of non-invasive medical sensors for continuous monitoring of blood pressure and their validation in critical care practice. 2023[97] | Original research | Non-invasive medical sensors for continuous monitoring of blood pressure                                                | Various Sources |
| <b>89</b> | Francis N, et al. Patent Landscape Review on Ankle Sprain Prevention Method: Technology Updates. 2023[98]                                                                        | Original research | Ankle Sprain Prevention technology                                                                                      | Patents         |
| <b>90</b> | Juiz PJ, et al. Patent Mining on the Use of Antioxidant Phytochemicals in the Technological Development for the Prevention and Treatment of Periodontitis. 2024[99]              | Original research | Antioxidant Phytochemicals                                                                                              | Patents         |
| <b>91</b> | Chartoumpekis DV, et al. Patent Review (2017-2020) of the Keap1/Nrf2 Pathway Using PatSeer Pro: Focus on Autoimmune Diseases. 2020[100]                                          | Original research | Nuclear factor erythroid 2-related factor 2 (Nrf2) and cytoplasmic inhibitor Kelch-like ECH-associated protein 1 (Keap1 | Patents         |
| <b>92</b> | Parihar K, et al. A patent review on strategies for biological control of mosquito vector. 2020[101]                                                                             | Original research | Biological control of mosquito                                                                                          | Patents         |
| <b>93</b> | Xiong YH, et al. Patented technologies for schistosomiasis                                                                                                                       | Original research | Medicines, devices                                                                                                      | Patents         |

|            |                                                                                                                                                                         |        |                                                          |                 |
|------------|-------------------------------------------------------------------------------------------------------------------------------------------------------------------------|--------|----------------------------------------------------------|-----------------|
|            | control and prevention filed by Chinese applicants. 2021[102]                                                                                                           |        |                                                          |                 |
| <b>94</b>  | Russo Serafini M, et al. The Patenting and Technological Trends in Hernia Mesh Implants. 2020[103]                                                                      | Review | Prosthetic surgical meshes                               | Various Sources |
| <b>95</b>  | Mendez CRA, et al. Patentometric analysis of the technological development of Biotechnology for health in higher education institutions in Rio Grande do Sul. 2024[104] | Review | Biotechnology in healthcare                              | Patents         |
| <b>96</b>  | Gkika DA, et al. Patents of nanomaterials related with cancer treatment applications. 2020[105]                                                                         | Review | Nanomaterials related with cancer treatment applications | Patents         |
| <b>97</b>  | Gadiya Y, et al. Pharmaceutical patent landscaping: A novel approach to understand patents from the drug discovery perspective. 2023[106]                               | Review | Pharmaceuticals and biotechnology                        | Patents         |
| <b>98</b>  | Patel S, et al. Probiotic Formulations: A Patent Landscaping Using the Text Mining Approach. 2022[107]                                                                  | Review | Probiotics                                               | Patents         |
| <b>99</b>  | Shivakumar P, et al. Prospection of chitosan and its derivatives in wound healing: Proof of patent analysis. 2021[108]                                                  | Review | Chitosan                                                 | Various Sources |
| <b>100</b> | Kurakula M, et al. Prospection of recent chitosan biomedical trends: Evidence from patent analysis. 2020[109]                                                           | Review | Chitosan                                                 | Various Sources |
| <b>101</b> | Islam MM, et al. The Race to Replace PDE5i: Recent Advances and Interventions to Treat or Manage Erectile Dysfunction: Evidence from                                    | Review | Phosphodiesterase type 5 inhibitor                       | Various Sources |

|            |                                                                                                                                                                                        |                   |                                       |                 |
|------------|----------------------------------------------------------------------------------------------------------------------------------------------------------------------------------------|-------------------|---------------------------------------|-----------------|
|            | Patent Landscape (2016–2021). 2022[110]                                                                                                                                                |                   |                                       |                 |
| <b>102</b> | Durmuşoğlu A, et al. Remembering Medical Ventilators and Masks in the Days of COVID-19: Patenting in the Last Decade in Respiratory Technologies. 2022[111]                            | Original research | Medical Ventilators and Masks         | Patents         |
| <b>103</b> | Zhang T, et al. The research activities and development trends of antineoplastics targeting PD-1/PD-L1 based on scientometrics and patentometrics. 2022[112]                           | Conference paper  | Antineoplastics                       | Patents         |
| <b>104</b> | DasNandy A, et al. A review of patent literature on the regulation of glucose metabolism by six phytochemicals in the management of diabetes mellitus and its complications. 2023[113] | Review            | Phytochemicals                        | Patents         |
| <b>105</b> | Yeh TF, et al. A review of technological developments in lipid nanoparticle application for mRNA vaccination. 2023[114]                                                                | Original research | Lipid nanoparticle                    | Various Sources |
| <b>106</b> | Wang Q, et al. A Scientometric Analysis and Visualization of Scientific Research and Technology Innovation in Needle-free Insulin Injection From 1974 to 2022. 2023[115]               | Original research | Needle-free insulin injection         | Various Sources |
| <b>107</b> | Jiang J, et al. The state of the art and future trends of root canal files from the perspective of patent analysis: a study design. 2022[116]                                          | Review            | Root canal files                      | Patents         |
| <b>108</b> | Kong X, et al. STING as an emerging therapeutic target for drug discovery:                                                                                                             | Review            | Stimulator of interferon genes (STING | Patents         |

|            |                                                                                                                                                    |                   |                                              |                 |
|------------|----------------------------------------------------------------------------------------------------------------------------------------------------|-------------------|----------------------------------------------|-----------------|
|            | Perspectives from the global patent landscape. 2022[117]                                                                                           |                   |                                              |                 |
| <b>109</b> | Hazis NUA, et al. Systematic Patent Review of Nanoparticles in Drug Delivery and Cancer Therapy in the Last Decade. 2021[118]                      | Review            | Nanoparticles                                | Patents         |
| <b>110</b> | Verma R. A Technical Analysis of MIOT in Sensitive Aspect. 2023[119]                                                                               | Conference paper  | Biosensors                                   | Various Sources |
| <b>111</b> | Barragán-Ocaña A, et al. Technological development and patent analysis: the case of biopharmacy in the world and in Latin America. 2022[120]       | Original research | Biopharmaceuticals                           | Patents         |
| <b>112</b> | Hwang J, et al. Technological Opportunity Analysis: Assistive Technology for Blind and Visually Impaired People. 2020[121]                         | Original research | Visual assistive device                      | Patents         |
| <b>113</b> | Liu J, et al. Technology Forecasting based on Topic Analysis and Social Network Analysis: A Case Study Focusing on Gene Editing Patents. 2021[122] | Original research | Gene editing technology                      | Patents         |
| <b>114</b> | Wadhwa RR, et al. Temporal Trends in the United States Patent Landscape: Innovation in Cardiology Across Industry and Academia. 2023[123]          | Original research | Diagnostics and therapeutics in medical care | Patents         |
| <b>115</b> | Erzurumlu SS, et al. Topic modeling and technology forecasting for assessing the commercial viability of healthcare innovations. 2020[124]         | Original research | Healthcare innovations                       | Patents         |
| <b>116</b> | Pasek JE, et al. Trends in bioengineering patents granted 2000-2019. 2021[125]                                                                     | Original research | Bioengineering                               | Patents         |

|            |                                                                                                                                                            |                   |                                                                   |                 |
|------------|------------------------------------------------------------------------------------------------------------------------------------------------------------|-------------------|-------------------------------------------------------------------|-----------------|
| <b>117</b> | Chowdhury AR, et al. The trends in CRISPR research: A patent and literature study with a focus on India. 2021[126]                                         | Review            | Clustered regularly interspaced short palindromic repeat (CRISPR) | Various Sources |
| <b>118</b> | Almeida FLC, et al. Erratum to "Trends in lipase immobilization: Bibliometric review and patent analysis". 2021[127]                                       | Review            | Biotechnology                                                     | Various Sources |
| <b>119</b> | Bacigalupo ML, et al. Unveiling patenting strategies of therapeutics and vaccines: evergreening in the context of COVID-19 pandemic. 2023[128]             | Original research | Therapeutics and vaccines                                         | Patents         |
| <b>120</b> | Chen TA, et al. Using Big Data Analytics on Health Industry Development: The Empirical Intellectual Property Analysis from Stem Cell Therapy. 2021[129]    | Original research | Stem cell therapy                                                 | Patents         |
| <b>121</b> | Liu K, et al. What, Where When and How of COVID-19 Patents Landscape: A Bibliometrics Review. 2022[130]                                                    | Original research | COVID-19 related technologies                                     | Patents         |
| <b>122</b> | Rincon-Lopez J, et al. When Cyclodextrins Met Data Science: Unveiling Their Pharmaceutical Applications through Network Science and Text-Mining. 2021[131] | Original research | Cyclodextrins                                                     | Patents         |
| <b>123</b> | Kim WJ, et al. The worldwide patent landscape of dental implant technology. 2022[132]                                                                      | Review            | Dental implants                                                   | Patents         |
| <b>124</b> | Azman AA, et al. Worldwide trend discovery of structural and functional relationship of metallo- $\beta$ -lactamase for structure-based drug design: A     | Review            | Metallo- $\beta$ -lactamase                                       | Various Sources |

|  |                                                        |  |  |  |
|--|--------------------------------------------------------|--|--|--|
|  | bibliometric evaluation and patent analysis. 2023[133] |  |  |  |
|--|--------------------------------------------------------|--|--|--|
