# Supplementary material for: MedTech innovation identification: A rapid scoping review of patent research studies to inform horizon scanning methods
Source: bioRxiv or medRxiv preprint supplement (doi:10.1101/2024.12.09.24318714), 2024-12-10
Supplement: Supplementary file [file media-2.pdf]

## Appendix A

Full search strategies used for the identification of patent research studies

**Database:** Embase <1996 to 2024 Week 22>

**URL:** Ovid via University library link

**Data of search:** 06/06/2024

**Number of retrieved records:** 331

**Search strategy:**

|   |                                    |     |
|---|------------------------------------|-----|
| 1 | patent* research.ti,ab,kf,kw.      | 59  |
| 2 | patent* analys*.ti,ab,kf,kw.       | 317 |
| 3 | patent* landscape.ti,ab,kf,kw.     | 253 |
| 4 | (patent* adj3 trend*).ti,ab,kf,kw. | 241 |
| 5 | (patent* adj3 mining).ti,ab,kf,kw. | 42  |
| 6 | or/1-5                             | 812 |
| 7 | limit 6 to yr="2020 -Current"      | 331 |

**Notes:**

Downloaded into Endnote for de-duplication.

**Database:** IEEE Xplore Digital library

**URL:** via University library link

**Data of search:** 06/06/2024

**Number of retrieved records:** 580

**Search strategy:**

("Publication Title": patent research OR "Abstract": patent research OR "Author Keywords": patent research OR "Document Title": patent analysis OR "Abstract": patent analysis OR "Author Keywords": patent analysis OR "Document Title": patent analyses OR "Abstract": patent analyses OR "Author Keywords": patent analyses OR "Publication Title": patent landscape OR "Abstract": patent landscape OR "Author Keywords": patent landscape OR "Publication Title": patent trend OR "Abstract": patent trend OR "Author Keywords": patent trend OR "Publication Title": patent trends OR "Abstract": patent trends OR "Author Keywords": patent trends OR "Publication Title": patent mining OR "Abstract": patent mining OR "Author Keywords": patent mining)

Publication types filter: Conferences, Journals, Early Access Articles

Time limits applied: 2020 - 2024

**Notes:**

All downloaded in csv format.

**Database:** Web of Science

Institute for Scientific Information (2000) Web of science. Philadelphia, PA]: Thomson Reuters.

**URL:** via University link

**Date of search:** 06/06/2024

**Number of retrieved records:** 830

**Search strategy:**

(TS=("patent research") OR TI=("patent research") OR AB=("patent research")) OR (TS=("patent analysis") OR TI=("patent analysis") OR AB=("patent analysis")) OR (TS=("patent analyses") OR TI=("patent analyses") OR AB=("patent analyses")) OR (TS=("patent landscape") OR TI=("patent landscape") OR AB=("patent landscape")) OR (TS=("patent trend") OR TI=("patent trend") OR AB=("patent trend")) OR (TS=("patent trends") OR TI=("patent trends") OR AB=("patent trends")) OR (TS=("patent mining") OR TI=("patent mining") OR AB=("patent mining"))

Publication date limits: 2020, 2021, 2022, 2023

**Notes:**

All exported into Endnote
